# Supplementary material for: Exome Sequencing in a Swiss Childhood Glaucoma Cohort Reveals CYP1B1 and FOXC1 Variants as Most Frequent Causes
Source: PubMed Central journal article supplement — Transl Vis Sci Technol. 2020 Jun 30;9(7):47. doi: 10.1167/tvst.9.7.47 (PMC7414719; doi:10.1167/tvst.9.7.47), 2020-06-30
Supplement: tvst-9-7-47_s001.pdf [file tvst-9-7-47_s001.pdf]

### Review of genes associated with primary congenital glaucoma

*CYP1B1*, which encodes a monooxygenase, has been characterized from the first mapped locus GLC3A, and pathogenic variants in the gene account for 20-100 % of familial cases with recessive inheritance pattern (OMIM# 231300).<sup>1-3</sup> More than 200 pathogenic variants have been reported to date in the human gene mutation database (HGMD), the majority of which result in loss of function due to alterations in protein stability, abundance, or enzymatic activity.<sup>4,5</sup> However, the exact role of *CYP1B1* in the formation of the anterior segment is not yet fully understood. So far, no genes have been associated with the second (GLC3B, OMIM# 600975) and third locus (GLC3C, OMIM# 613085).<sup>6,7</sup> In a large Pakistani family, a fourth locus (GLC3D, OMIM# 613086) was identified, which is controversial due to its proximity to GLC3C.<sup>8</sup> *LTBP2*, an extracellular matrix protein, was mapped to GLC3D.<sup>9</sup> However, it is disputed whether *LTBP2* pathogenic variants lead to megalocornea with zonular weakness and lens-related secondary glaucoma, rather than primary congenital glaucoma (PCG).<sup>10</sup> The gene *TEK* is also associated with PCG. Souma et al. observed compromised aqueous humor outflow in *Tek*-null-mice, but there was marked variable expressivity in human subjects.<sup>11</sup> Similarly, *ANGPT1/2* were shown to play a role in the development of Schlemm's canal in mice, however incomplete penetrance of *ANGPT1* variants was observed in two out of three families with PCG.<sup>12</sup> Siggs et al. recently emphasized that a significant number of patients lacking pathogenic variants in *CYP1B1* carried *FOXC1* pathogenic variants or copy number variations.<sup>13</sup> *FOXC1* is a member of forkhead box family transcription factors involved in the formation of the anterior segment (OMIM# 601090).<sup>14</sup> The whole range of gene alterations have been described as causes of autosomal dominant anterior segment defects, often classified as part of the ARS-spectrum (OMIM# 180500, OMIM# 601499, OMIM# 602482).<sup>14-17</sup> The majority of variants are located within the DNA-binding forkhead domain, although pathogenic variants in the N- and C-terminal activation- and inhibition domains have also been identified.<sup>18,19</sup> Both hypomorphic and hypermorphic variants were shown to alter transcriptional activity of *FOXC1*.<sup>20</sup>

**Table S1** Gene list used for filtering of whole-exome-sequencing data

| Genes associated with childhood glaucoma                                                                 | Gene symbol                                                                                                                                                                                                                                                                                                                                                                                                                                                                                                                                                                                                                                                                                                                                                                                                                                                                                                                                                                                                                                                                                                                                                                                                                                                         |
|----------------------------------------------------------------------------------------------------------|---------------------------------------------------------------------------------------------------------------------------------------------------------------------------------------------------------------------------------------------------------------------------------------------------------------------------------------------------------------------------------------------------------------------------------------------------------------------------------------------------------------------------------------------------------------------------------------------------------------------------------------------------------------------------------------------------------------------------------------------------------------------------------------------------------------------------------------------------------------------------------------------------------------------------------------------------------------------------------------------------------------------------------------------------------------------------------------------------------------------------------------------------------------------------------------------------------------------------------------------------------------------|
| <b>a. Primary congenital glaucoma</b>                                                                    | <i>ANGPT1</i> <sup>12</sup> , <i>CYP1B1</i> <sup>2</sup> , <i>FOXC1</i> <sup>14</sup> , <i>LTBP2</i> <sup>9</sup> , <i>TEK</i> <sup>12,21</sup>                                                                                                                                                                                                                                                                                                                                                                                                                                                                                                                                                                                                                                                                                                                                                                                                                                                                                                                                                                                                                                                                                                                     |
| <b>b. Juvenile open angle glaucoma</b>                                                                   | <i>MYOC</i> <sup>22</sup>                                                                                                                                                                                                                                                                                                                                                                                                                                                                                                                                                                                                                                                                                                                                                                                                                                                                                                                                                                                                                                                                                                                                                                                                                                           |
| <b>c. Secondary/syndromic childhood glaucoma</b>                                                         | <i>ADAM9</i> <sup>23</sup> , <i>ADAMTSL1</i> <sup>24</sup> , <i>B3GLCT</i> <sup>25</sup> , <i>BMP4</i> <sup>26</sup> , <i>COL1A1</i> <sup>27</sup> , <i>COL4A1</i> <sup>28</sup> , <i>CPAMD8</i> <sup>23</sup> , <i>CREBBP</i> <sup>29</sup> , <i>DDX58</i> <sup>30</sup> , <i>FBN1</i> <sup>31</sup> , <i>FOXE3</i> <sup>32</sup> , <i>FZD5</i> <sup>33</sup> , <i>GJA1</i> <sup>34</sup> , <i>GJA8</i> <sup>35</sup> , <i>HCCS</i> <sup>36</sup> , <i>ISPD</i> <sup>37</sup> , <i>JAG1</i> <sup>38,39</sup> , <i>LAMB2</i> <sup>40</sup> , <i>LMX1B</i> <sup>41</sup> , <i>NDP</i> <sup>42</sup> , <i>NF1</i> <sup>43</sup> , <i>NHS</i> <sup>44</sup> , <i>NOTCH2</i> <sup>45</sup> , <i>NPHS1</i> <sup>46</sup> , <i>PAX6</i> <sup>47</sup> , <i>PEX1</i> <sup>48</sup> , <i>PIK3R1</i> <sup>49</sup> , <i>PITX2</i> <sup>50</sup> , <i>PITX3</i> <sup>51</sup> , <i>PLOD1</i> <sup>52</sup> , <i>POMT1</i> <sup>53</sup> , <i>PXDN</i> <sup>54</sup> , <i>SBF2</i> <sup>55</sup> , <i>SH3PX2</i> <sup>56</sup> , <i>SLC4A4</i> <sup>57</sup> , <i>TFAP2A</i> <sup>42</sup> , <i>TRIM44</i> <sup>58</sup>                                                                                                                                                       |
| <b>d. Conditions mimicking childhood glaucoma</b>                                                        | <i>CHRDL1</i> <sup>59</sup> , <i>COL8A2</i> <sup>60,61</sup> , <i>SLC4A1</i> <sup>160,62</sup>                                                                                                                                                                                                                                                                                                                                                                                                                                                                                                                                                                                                                                                                                                                                                                                                                                                                                                                                                                                                                                                                                                                                                                      |
| <b>Candidate genes</b>                                                                                   |                                                                                                                                                                                                                                                                                                                                                                                                                                                                                                                                                                                                                                                                                                                                                                                                                                                                                                                                                                                                                                                                                                                                                                                                                                                                     |
| <b>e. Primary and/or juvenile open angle glaucoma</b>                                                    | <i>ASB10</i> <sup>63</sup> , <i>ATOH7</i> <sup>64</sup> , <i>B4GALT3</i> <sup>65</sup> , <i>BEST1</i> <sup>36</sup> , <i>CARD10</i> <sup>66</sup> , <i>CD5</i> <sup>67</sup> , <i>CDKN2B</i> <sup>68</sup> , <i>CNTN4</i> <sup>69</sup> , <i>COL8A2</i> <sup>70</sup> , <i>DMXL1</i> <sup>67</sup> , <i>EFEMP1</i> <sup>71</sup> , <i>FAM27E5</i> <sup>67</sup> , <i>GAS7</i> <sup>68</sup> , <i>GPR180</i> <sup>72</sup> , <i>IMMT</i> <sup>67</sup> , <i>NPHP1</i> <sup>67</sup> , <i>NT5C1B</i> <sup>67</sup> , <i>NTF4</i> <sup>73</sup> , <i>OLFM2</i> <sup>74</sup> , <i>OPTC</i> <sup>75</sup> , <i>OPTN</i> <sup>76</sup> , <i>PAK5</i> <sup>67</sup> , <i>PRPF8</i> <sup>77</sup> , <i>RPGRIP1</i> <sup>78</sup> , <i>SIX6</i> <sup>79</sup> , <i>TBK1</i> <sup>67</sup> , <i>TMCO1</i> <sup>68</sup> , <i>TP53BP2</i> <sup>80</sup> , <i>TULP3</i> <sup>67</sup> , <i>WDR36</i> <sup>81</sup>                                                                                                                                                                                                                                                                                                                                                             |
| <b>f. Angle closure glaucoma</b>                                                                         | <i>ANGPTL7</i> <sup>82</sup> , <i>COL11A1</i> <sup>83</sup> , <i>COL18A1</i> <sup>84</sup> , <i>CRYAA3</i> <sup>36</sup> , <i>CRYBA4</i> <sup>36</sup> , <i>CRYGC3</i> <sup>36</sup> , <i>CRYGD3</i> <sup>36</sup> , <i>DIP2A</i> <sup>84</sup> , <i>EYA1</i> <sup>36</sup> , <i>GDF6</i> <sup>36</sup> , <i>KERA</i> <sup>85</sup> , <i>MFRP</i> <sup>86</sup> , <i>MMP9</i> <sup>87</sup> , <i>PRSS56</i> <sup>88</sup> , <i>VSX2</i> <sup>86</sup>                                                                                                                                                                                                                                                                                                                                                                                                                                                                                                                                                                                                                                                                                                                                                                                                               |
| <b>g. Genes highly expressed in the trabecular meshwork identified<sup>89</sup></b>                      | <i>ACTB</i> , <i>ACTN2</i> , <i>ALP</i> , <i>APOD</i> , <i>ARGBP2</i> , <i>ARPC2</i> , <i>ARPC3</i> , <i>ARPC1</i> , <i>CALD1</i> , <i>CAPZA1</i> , <i>CCN2</i> , <i>CDT6</i> , <i>CFL2</i> , <i>CHI3L1</i> , <i>CNB1</i> , <i>CNN3</i> , <i>COL1A2</i> , <i>COL3A1</i> , <i>COL4A5</i> , <i>COX7C</i> , <i>CTTNBP2</i> , <i>CTTN</i> , <i>DCN</i> , <i>DMN</i> , <i>DSTN</i> , <i>EEF1A1</i> , <i>EFEMP1</i> , <i>EID1</i> , <i>FN1</i> , <i>FOS</i> , <i>GNAS</i> , <i>GSN</i> , <i>IGFBP7</i> , <i>IMPG1</i> , <i>KLHL2</i> , <i>KRT12</i> , <i>LAMB1</i> , <i>LAPTM4B</i> , <i>LUM</i> , <i>MACF1</i> , <i>MGP</i> , <i>MGP</i> , <i>MYL6</i> , <i>NACA</i> , <i>NDUFA5</i> , <i>PALLD</i> , <i>PCP4</i> , <i>PMCA</i> , <i>PTMA</i> , <i>RGS</i> , <i>RPL12</i> , <i>RPL23</i> , <i>RPL23A</i> , <i>RPL27</i> , <i>RPL31</i> , <i>RPL37</i> , <i>RPL37A</i> , <i>RPL41</i> , <i>RPL5</i> , <i>RPL6</i> , <i>RPL7</i> , <i>RPL9</i> , <i>RPS20</i> , <i>RPS24</i> , <i>RPS25</i> , <i>RPS27A</i> , <i>RPS3A</i> , <i>RPS8</i> , <i>SEMA3E</i> , <i>SGCE</i> , <i>SMOC2</i> , <i>SORBS2</i> , <i>SPARC</i> , <i>SPARCL1</i> , <i>SPARCL1</i> , <i>SPP1</i> , <i>TMSB4X</i> , <i>TMSB4X</i> , <i>TPM1</i> , <i>TPT1</i> , <i>UQCRB</i> , <i>VIM</i> , <i>ZAKA</i> |
| <b>h. Genes highly expressed in the trabecular meshwork and within GLC3B or GLC3C locus<sup>89</sup></b> | <i>AL13727</i> , <i>CTD6</i> , <i>c-FOS</i> , <i>EIF4C</i> , <i>EIF4G3</i> , <i>FLJ10199</i> , <i>FLJ10521</i> , <i>FLJ13553</i> , <i>FLJ22042</i> , <i>HNPR</i> , <i>LOC1269</i> , <i>LOC57862</i> , <i>LTBP2</i> , <i>MFN2</i> , <i>MIG6</i> , <i>MLH3</i> , <i>NPC2</i> , <i>P29</i> , <i>PINK1</i> , <i>PMSCL2</i> , <i>RERE</i> , <i>RPL11</i> , <i>S164</i> , <i>SFRS5</i>                                                                                                                                                                                                                                                                                                                                                                                                                                                                                                                                                                                                                                                                                                                                                                                                                                                                                    |

|                                                                                                                                                            |                                                                                                                                                                                                                                                                                                                                                                                                                                                                                                                                                                                                                                                                                                                     |
|------------------------------------------------------------------------------------------------------------------------------------------------------------|---------------------------------------------------------------------------------------------------------------------------------------------------------------------------------------------------------------------------------------------------------------------------------------------------------------------------------------------------------------------------------------------------------------------------------------------------------------------------------------------------------------------------------------------------------------------------------------------------------------------------------------------------------------------------------------------------------------------|
| i. <b>Genes harboring copy number variants identified in primary congenital glaucoma patients by Lee et al.<sup>90</sup></b>                               | ACVR1C, ADAMTSL3, ANO7, BTAF1, CSNK2A2, EXO5, FAM120A, GATA6, GNB5, GPR12, HEY1, LRRC4, MAP6, PGAM5, PHIP, RAD54B, SLC4A3, TAL1, TCF7L1, TCF7L2, TECTA, XKR4, ZNRF1                                                                                                                                                                                                                                                                                                                                                                                                                                                                                                                                                 |
| j. <b>Predicted functional partners of CYP1B1, MYOC, LTBP2, PAX6, PITX2, PITX3, FOXC1, FOXE3, EYA1, LMX1B and MAF according to Lee et al.<sup>90</sup></b> | ACYP1, ALX4, ANPEP, BACH2, BDNF, CCND2, CHMP4B, COK4A3, COL4A4, COMMD, COMT, CTNNB1, CXCR4, CYP1B1, CYP1B1, DACH1, DLL4, ELN, EPHX1, ESYT3, FGF2, FLNA, FN1, FOXA2, FOXC1, FOXE3, FOXF2, FOXH1, GCG, GDNF, GIPC1, GPM6A, GPR161, GSTA1, GSTM1, GSTM3, GSTP1, HDAC9, HEY2, HRAS, IL4, IPO13, IRF4, LDB1, LEF1, LOXL1, LRP6, LTB, MFAP2, MITF, MSX2, MTA1, MYB, MYOG, NEUROG2, NFATC1, NFE2, NPHS2, NPRL3, NPS, NR4A2, OLFM3, OPTN, PAX1, PAX2, PAX3, PAX6, PITX2, PKNPX1, POU5F1, PRODH2, RGS1, RGS2, RGS7, RSRFR2, SERPINF, SHH, SIX1, SIX2, SIX3, SIX5, SLC18A2, SLC6A3, SMAD2, SMAD4, SNCG, SOX2, SOX3, SUCLG1, TGFB1, TH, TIMP1, TLX1, TMTC1, TRIM11, UGT1A1, UGT1A6, UGT1A9, UGTB7, WDR36, WHSC1, WNT7A, ZNF185 |
| k. <b>Other:</b>                                                                                                                                           | BCO2 <sup>23</sup> , COL4A2 <sup>91</sup> , COL4A3(12), DGKQ <sup>23</sup> , DNAJB1(54), DPT <sup>92</sup> , FOXC2 <sup>93</sup> , GPATCH3 <sup>94</sup> , MMP <sup>195</sup> , MMP12 <sup>96</sup> , MMP13 <sup>96</sup> , MMP14 <sup>96</sup> , MMP2 <sup>95</sup> , MMP3 <sup>95</sup> , MMP9 <sup>95</sup> , NFATC1 <sup>92</sup> , OPA <sup>197</sup> , RELN <sup>23</sup> , SALL2 <sup>98</sup> , SOX <sup>199</sup> , TIMP <sup>187</sup> , TSP1 <sup>100</sup> , TSP2 <sup>100</sup> , TULP2, ANGPT2 <sup>12</sup>                                                                                                                                                                                          |

## References

- Akarsu AN, Hossain A, Stoilov I, et al. Mapping a major locus for primary congenital glaucoma (Buphthalmos) to 2p21 and evidence for genetic heterogeneity. *Invest Ophthalmol Vis Sci.* 1996;37(3).
- Stoilov I, Akarsu AN, Sarfarazi M. Identification of three different truncating mutations in cytochrome P4501B1 (CYP1B1) as the principal cause of primary congenital glaucoma (Buphthalmos) in families linked to the GLC3A locus on chromosome 2p21. *Hum Mol Genet.* 1997;6(4):641-647.
- Sharafieh R, Child AH, Sarfarazi M. Molecular genetics of primary congenital glaucoma. In: Traboulsi EI, ed. *Genetic Diseases of the Eye.* 2nd ed. New York: Oxford University Press; 2012:295-310.
- García-Antón MT, Salazar JJ, De Hoz R, et al. Goniodysgenesis variability and activity of CYP1B1 genotypes in primary congenital glaucoma. *PLoS One.* 2017;12(4).
- Chavarria-Soley G, Sticht H, Aklillu E, et al. Mutations in CYP1B1 cause primary congenital glaucoma by reduction of either activity or abundance of the enzyme. *Hum Mutat.* 2008;29(9):1147-1153.
- Akarsu A. A second locus (GLC3B) for primary congenital glaucoma (Buphthalmos) maps to the 1p36 region. *Hum Mol Genet.* 1996;5(8):1199-1203.
- Stoilov I, Sarfarazi M. The Third Genetic Locus (GLC3C) for Primary Congenital Glaucoma (PCG) Maps to Chromosome 14q24.3. *Invest Ophthalmol Vis Sci.* 2002;43(13).
- Firasat S, Riazuddin SA, Hejtmancik JF, Riazuddin S. Primary congenital glaucoma localizes to chromosome 14q24.21-24.3 in two consanguineous Pakistani families. *Mol Vis.* 2008;14:1659-1665.
- Ali M, McKibbin M, Booth A, et al. Null Mutations in LTBP2 Cause Primary Congenital Glaucoma. *Am J Hum Genet.* 2009;84(5):664-671.
- Khan AO, Aldahmesh MA, Alkuraya FS. Congenital megalocornea with zonular weakness and childhood lens-related secondary glaucoma - a distinct phenotype caused by recessive LTBP2 mutations. *Mol Vis.* 2011;17(September):2570-2579.
- Souma T, Tompson SW, Thomson BR, et al. Angiopoietin receptor

- TEK mutations underlie primary congenital glaucoma with variable expressivity. *J Clin Invest*. 2016;126(7):2575-2587.
12. Thomson BR, Souma T, Tompson SW, et al. Angiopoietin-1 is required for Schlemm's canal development in mice and humans. *J Clin Invest*. 2017;127(12):4421-4436.
  13. Siggs OM, Souzeau E, Pasutto F, et al. Prevalence of FOXC1 Variants in Individuals with a Suspected Diagnosis of Primary Congenital Glaucoma. *JAMA Ophthalmol*. 2019;137(4):348-355.
  14. Nishimura DY, Swiderski RE, Alward WLM, et al. The forkhead transcription factor gene FKHL7 is responsible for glaucoma phenotypes which map to 6p25. *Nat Genet*. 1998;19(2):140-147.
  15. Lehmann OJ, Ebenezer ND, Jordan T, et al. Chromosomal duplication involving the forkhead transcription factor gene FOXC1 causes iris hypoplasia and glaucoma. *Am J Hum Genet*. 2000;67(5):1129-1135.
  16. Alward WLM. Axenfeld-Rieger syndrome in the age of molecular genetics. *Am J Ophthalmol*. 2000;130(1):107-115.
  17. Seifi M, Walter MA. Axenfeld-Rieger syndrome. *Clin Genet*. 2018;93(6):1123-1130.
  18. Souzeau E, Siggs OM, Zhou T, et al. Glaucoma spectrum and age-related prevalence of individuals with FOXC1 and PITX2 variants. *Eur J Hum Genet*. 2017;25(7):839-847.
  19. D'haene B, Meire F, Claerhout I, et al. Expanding the spectrum of FOXC1 and PITX2 mutations and copy number changes in patients with anterior segment malformations. *Invest Ophthalmol Vis Sci*. 2011;52(1):324-333.
  20. Medina-Trillo C, Sánchez-Sánchez F, Aroca-Aguilar JD, et al. Hypo- and hypermorphic FOXC1 mutations in dominant glaucoma: Transactivation and phenotypic variability. *PLoS One*. 2015;10(3):1-22.
  21. Limaye N, Wouters V, Uebelhoer M, et al. Somatic mutations in angiopoietin receptor gene TEK cause solitary and multiple sporadic venous malformations. *Nat Genet*. 2009;41(1):118-124.
  22. Stone EM, Fingert JH, Alward WL, et al. Identification of a gene that causes primary open angle glaucoma. *Science*. 1997;275(5300):668-670.
  23. Alsaif HS, Khan AO, Patel N, et al. Congenital glaucoma and CYP1B1: an old story revisited. *Hum Genet*. 2019;138(8-9):1043-1049.
  24. Hendee K, Wang LW, Reis LM, Rice GM, Apte SS, Semina E V. Identification and functional analysis of an ADAMTSL1 variant associated with a complex phenotype including congenital glaucoma, craniofacial, and other systemic features in a three-generation human pedigree. *Hum Mutat*. 2017;38(11):1485-1490.
  25. Lesnik Oberstein SAJ, Kriek M, White SJ, et al. Peters Plus syndrome is caused by mutations in B3GALTL, a putative glycosyltransferase. *Am J Hum Genet*. 2006;79(3):562-566.
  26. Reis LM, Tyler RC, Schilter KF, et al. BMP4 loss-of-function mutations in developmental eye disorders including SHORT syndrome. *Hum Genet*. 2011;130(4):495-504.
  27. Mauri L, Uebe S, Sticht H, et al. Expanding the clinical spectrum of COL1A1 mutations in different forms of glaucoma. *Orphanet J Rare Dis*. 2016;11(1):108.
  28. Sibon I, Coupry I, Menegon P, et al. COL4A1 mutation in Axenfeld-Rieger anomaly with leukoencephalopathy and stroke. *Ann Neurol*. 2007;62(2):177-184.
  29. Petrij F, Giles RH, Dauwerse HG, et al. Rubinstein-Taybi syndrome caused by mutations in the transcriptional co-activator CBP. *Nature*. 1995;376(6538):348-351.
  30. Jang M-A, Kim EK, Now H, et al. Mutations in DDX58, which encodes RIG-I, cause atypical Singleton-Merten syndrome. *Am J Hum Genet*. 2015;96(2):266-274.
  31. Maslen CL, Corson GM, Maddox BK, Glanville RW, Sakai LY. Partial sequence of a candidate gene for the Marfan syndrome. *Nature*. 1991;352(6333):334-337.
  32. Semina E V, Brownell I, Mintz-Hittner HA, Murray JC, Jamrich M. Mutations in the human forkhead transcription factor FOXE3

- associated with anterior segment ocular dysgenesis and cataracts. *Hum Mol Genet.* 2001;10(3):231-236.
33. Liu C, Widen SA, Williamson KA, et al. A secreted WNT-ligand-binding domain of FZD5 generated by a frameshift mutation causes autosomal dominant coloboma. *Hum Mol Genet.* 2016;25(7):1382-1391.
  34. Paznekas WA, Boyadjiev SA, Shapiro RE, et al. Connexin 43 (GJA1) mutations cause the pleiotropic phenotype of oculodentodigital dysplasia. *Am J Hum Genet.* 2003;72(2):408-418.
  35. Ma AS, Grigg JR, Prokudin I, Flaherty M, Bennetts B, Jamieson R V. New mutations in GJA8 expand the phenotype to include total sclerocornea. *Clin Genet.* 2018;93(1):155-159.
  36. Huang X, Xiao X, Jia X, et al. Mutation analysis of the genes associated with anterior segment dysgenesis, microcornea and microphthalmia in 257 patients with glaucoma. *Int J Mol Med.* 2015;36(4):1111-1117.
  37. Roscioli T, Kamsteeg E-J, Buysse K, et al. Mutations in ISPD cause Walker-Warburg syndrome and defective glycosylation of alpha-dystroglycan. *Nat Genet.* 2012;44(5):581-585.
  38. Orssaud C, Robert MP, Roche O. Relevance of Identifying JAG1 Mutations in Patients With Isolated Posterior Embryotoxon. *J Glaucoma.* 2016;25(12):923-925.
  39. Potamitis T, Fielder AR. Angle closure glaucoma in Alagille syndrome. A case report. *Ophthalmic Paediatr Genet.* 1993;14(2):101-104.
  40. Zenker M, Aigner T, Wendler O, et al. Human laminin beta2 deficiency causes congenital nephrosis with mesangial sclerosis and distinct eye abnormalities. *Hum Mol Genet.* 2004;13(21):2625-2632.
  41. Vollrath D, Jaramillo-Babb VL, Clough M V, et al. Loss-of-function mutations in the LIM-homeodomain gene, LMX1B, in nail-patella syndrome. *Hum Mol Genet.* 1998;7(7):1091-1098.
  42. Weh E, Reis LM, Happ HC, et al. Whole exome sequence analysis of Peters anomaly. *Hum Genet.* 2014;133(12):1497-1511.
  43. Li H, Liu T, Chen X, Xie L. A rare case of primary congenital glaucoma in combination with neurofibromatosis 1: a case report. *BMC Ophthalmol.* 2015;15(1):1-5. <http://dx.doi.org/10.1186/s12886-015-0142-8>.
  44. Burdon KP, McKay JD, Sale MM, et al. Mutations in a novel gene, NHS, cause the pleiotropic effects of Nance-Horan syndrome, including severe congenital cataract, dental anomalies, and mental retardation. *Am J Hum Genet.* 2003;73(5):1120-1130.
  45. Kamath BM, Bauer RC, Loomes KM, et al. NOTCH2 mutations in Alagille syndrome. *J Med Genet.* 2012;49(2):138-144.
  46. Reis LM, Tyler RC, Weh E, et al. Whole exome sequencing identifies multiple diagnoses in congenital glaucoma with systemic anomalies. *Clin Genet.* 2016;90(4):378-382.
  47. Jordan T, Hanson I, Zaletayev D, et al. The human PAX6 gene is mutated in two patients with aniridia. *Nat Genet.* 1992;1(5):328-332.
  48. Ebberink MS, Mooijer PAW, Gootjes J, Koster J, Wanders RJA, Waterham HR. Genetic classification and mutational spectrum of more than 600 patients with a Zellweger syndrome spectrum disorder. *Hum Mutat.* 2011;32(1):59-69.
  49. Chudasama KK, Winnay J, Johansson S, et al. SHORT syndrome with partial lipodystrophy due to impaired phosphatidylinositol 3 kinase signaling. *Am J Hum Genet.* 2013;93(1):150-157.
  50. Semina E V, Reiter R, Leysens NJ, et al. Cloning and characterization of a novel bicoid-related homeobox transcription factor gene, RIEG, involved in Rieger syndrome. *Nat Genet.* 1996;14(4):392-399.
  51. Semina E V, Ferrell RE, Mintz-Hittner HA, et al. A novel homeobox gene PITX3 is mutated in families with autosomal-dominant cataracts and ASMD. *Nat Genet.* 1998;19(2):167-170.
  52. Hyland J, Ala-Kokko L, Royce P, Steinmann B, Kivirikko KI, Myllyla R. A homozygous stop codon in the lysyl hydroxylase gene in two siblings with Ehlers-Danlos syndrome type VI. *Nat Genet.* 1992;2(3):228-231.
  53. Currier SC, Lee CK, Chang BS, et al. Mutations in POMT1 are found

- in a minority of patients with Walker-Warburg syndrome. *Am J Med Genet A*. 2005;133A(1):53-57.
54. Khan K, Rudkin A, Parry DA, et al. Homozygous mutations in PXDN cause congenital cataract, corneal opacity, and developmental glaucoma. *Am J Hum Genet*. 2011;89(3):464-473. <http://dx.doi.org/10.1016/j.ajhg.2011.08.005>.
  55. Azzedine H, Bolino A, Taieb T, et al. Mutations in MTMR13, a new pseudophosphatase homologue of MTMR2 and Sbf1, in two families with an autosomal recessive demyelinating form of Charcot-Marie-Tooth disease associated with early-onset glaucoma. *Am J Hum Genet*. 2003;72(5):1141-1153.
  56. Iqbal Z, Cejudo-Martin P, de Brouwer A, et al. Disruption of the podosome adaptor protein TKS4 (SH3PXD2B) causes the skeletal dysplasia, eye, and cardiac abnormalities of Frank-Ter Haar Syndrome. *Am J Hum Genet*. 2010;86(2):254-261.
  57. Dinour D, Chang M-H, Satoh J, et al. A novel missense mutation in the sodium bicarbonate cotransporter (NBCe1/SLC4A4) causes proximal tubular acidosis and glaucoma through ion transport defects. *J Biol Chem*. 2004;279(50):52238-52246.
  58. Zhang X, Qin G, Chen G, et al. Variants in TRIM44 Cause Aniridia by Impairing PAX6 Expression. *Hum Mutat*. 2015;36(12):1164-1167.
  59. Webb TR, Matarin M, Gardner JC, et al. X-linked megalocornea caused by mutations in CHRDL1 identifies an essential role for ventroptin in anterior segment development. *Am J Hum Genet*. 2012;90(2):247-259. <http://dx.doi.org/10.1016/j.ajhg.2011.12.019>.
  60. Khan AO. Conditions that can be mistaken as early childhood glaucoma. *Ophthalmic Genet*. 2011;32(3):129-137.
  61. Biswas S, Munier FL, Yardley J, et al. Missense mutations in COL8A2, the gene encoding the alpha2 chain of type VIII collagen, cause two forms of corneal endothelial dystrophy. *Hum Mol Genet*. 2001;10(21):2415-2423.
  62. Vithana EN, Morgan P, Sundaresan P, et al. Mutations in sodium-borate cotransporter SLC4A11 cause recessive congenital hereditary endothelial dystrophy (CHED2). *Nat Genet*. 2006;38(7):755-757.
  63. Pasutto F, Keller KE, Weisschuh N, et al. Variants in ASB10 are associated with open-angle glaucoma. *Hum Mol Genet*. 2012;21(6):1336-1349.
  64. Macgregor S, Hewitt AW, Hysi PG, et al. Genome-wide association identifies ATOH7 as a major gene determining human optic disc size. *Hum Mol Genet*. 2010;19(13):2716-2724.
  65. Liao RF, Zhong ZL, Ye MJ, Han LY, Ye DQ, Chen JJ. Identification of mutations in myocilin and beta-1,4-galactosyltransferase 3 genes in a Chinese family with primary open-angle glaucoma. *Chin Med J (Engl)*. 2016;129(23):2810-2815.
  66. Zhou T, Souzeau E, Sharma S, et al. Rare variants in optic disc area gene CARD10 enriched in primary open-angle glaucoma. *Mol Genet genomic Med*. 2016;4(6):624-633.
  67. Davis LK, Meyer KJ, Schindler EI, et al. Copy number variations and primary open-angle glaucoma. *Invest Ophthalmol Vis Sci*. 2011;52(10):7122-7133.
  68. Liu Y, Garrett ME, Yaspan BL, et al. DNA copy number variants of known glaucoma genes in relation to primary open-angle glaucoma. *Investig Ophthalmol Vis Sci*. 2014;55(12):8251-8258.
  69. Kaurani L, Vishal M, Kumar D, et al. Gene-rich large deletions are overrepresented in POAG patients of Indian and Caucasian origins. *Invest Ophthalmol Vis Sci*. 2014;55(5):3258-3264.
  70. Desronvil T, Logan-Wyatt D, Abdrabou W, et al. Distribution of COL8A2 and COL8A1 gene variants in Caucasian primary open angle glaucoma patients with thin central corneal thickness. *Mol Vis*. 2010;16:2185-2191.
  71. Mackay DS, Bennett TM, Shiels A. Exome Sequencing Identifies a Missense Variant in EFEMP1 Co-Segregating in a Family with Autosomal Dominant Primary Open-Angle Glaucoma. *PLoS One*. 2015;10(7):e0132529.
  72. Sergouniotis PI, Ellingford JM, O'Sullivan J, Fenerty CH, Black GC. Genome sequencing identifies a large deletion at 13q32.1 as the cause of microcoria and childhood-onset glaucoma. *Acta Ophthalmol*. 2017;95(3):e249-e250.

73. Pasutto F, Matsumoto T, Mardin CY, et al. Heterozygous NTF4 mutations impairing neurotrophin-4 signaling in patients with primary open-angle glaucoma. *Am J Hum Genet.* 2009;85(4):447-456.
74. Funayama T, Mashima Y, Ohtake Y, et al. SNPs and interaction analyses of noelin 2, myocilin, and optineurin genes in Japanese patients with open-angle glaucoma. *Invest Ophthalmol Vis Sci.* 2006;47(12):5368-5375.
75. Acharya M, Mookherjee S, Bhattacharjee A, et al. Evaluation of the OPTC gene in primary open angle glaucoma: functional significance of a silent change. *BMC Mol Biol.* 2007;8:21.
76. Rezaie T, Child A, Hitchings R, et al. Adult-onset primary open-angle glaucoma caused by mutations in optineurin. *Science.* 2002;295(5557):1077-1079.
77. Micheal S, Hogewind BF, Khan MI, et al. Variants in the PRPF8 Gene are Associated with Glaucoma. *Mol Neurobiol.* 2018;55(5):4504-4510.
78. Fernandez-Martinez L, Letteboer S, Mardin CY, et al. Evidence for RPGRIP1 gene as risk factor for primary open angle glaucoma. *Eur J Hum Genet.* 2011;19(4):445-451.
79. Carnes MU, Liu YP, Allingham RR, et al. Discovery and functional annotation of SIX6 variants in primary open-angle glaucoma. *PLoS Genet.* 2014;10(5):e1004372.
80. Micheal S, Saksens NTM, Hogewind BF, Khan MI, Hoyng CB, den Hollander AI. Identification of TP53BP2 as a Novel Candidate Gene for Primary Open Angle Glaucoma by Whole Exome Sequencing in a Large Multiplex Family. *Mol Neurobiol.* 2018;55(2):1387-1395.
81. Monemi S, Spaeth G, DaSilva A, et al. Identification of a novel adult-onset primary open-angle glaucoma (POAG) gene on 5q22.1. *Hum Mol Genet.* 2005;14(6):725-733.
82. Kuchtey J, Källberg ME, Gelatt KN, Rinkoski T, András M, Kuchtey RW. Angiopoietin-like 7 Secretion Is Induced by Glaucoma Stimuli and Its Concentration Is Elevated in Glaucomatous Aqueous Humor. 2010;49(8):1-23.
83. Vithana EN, Khor C-C, Qiao C, et al. Genome-wide association analyses identify three new susceptibility loci for primary angle closure glaucoma. *Nat Genet.* 2012;44(10):1142-1146.
84. Suri F, Yazdani S, Chapi M, et al. COL18A1 is a candidate eye iridocorneal angle-closure gene in humans. *Hum Mol Genet.* 2018;27(21):3772-3786.
85. Kumari D, Tiwari A, Choudhury M, Kumar A, Rao A, Dixit M. A Novel KERA Mutation in a Case of Autosomal Recessive Cornea Plana With Primary Angle-Closure Glaucoma. *J Glaucoma.* 2016;25(2):e106-9.
86. Aung T, Lim MCC, Wong TTL, et al. Molecular analysis of CHX10 and MFRP in Chinese subjects with primary angle closure glaucoma and short axial length eyes. *Mol Vis.* 2008;14:1313-1318.
87. De Groef L, Andries L, Siwakoti A, et al. Aberrant Collagen Composition of the Trabecular Meshwork Results in Reduced Aqueous Humor Drainage and Elevated IOP in MMP-9 Null Mice. *Invest Ophthalmol Vis Sci.* 2016;57(14):5984-5995.
88. Nair KS, Hmani-Aifa M, Ali Z, et al. Alteration of the serine protease PRSS56 causes angle-closure glaucoma in mice and posterior microphthalmia in humans and mice. *Nat Genet.* 2011;43(6):579-584.
89. Tomarev SI, Wistow G, Raymond V, Dubois S, Malyukova I. Gene expression profile of the human trabecular meshwork: NEIBank sequence tag analysis. *Invest Ophthalmol Vis Sci.* 2003;44(6):2588-2596.
90. Lee JH, Ki CS, Kim HJ, et al. Analysis of copy number variation using whole genome exonfocused array CGH in Korean patients with primary congenital glaucoma. *Mol Vis.* 2011;17(December):3583-3590.
91. Kuo DS, Labelle-Dumais C, Mao M, et al. Allelic heterogeneity contributes to variability in ocular dysgenesis, myopathy and brain malformations caused by Col4a1 and Col4a2 mutations. *Hum Mol Genet.* 2014;23(7):1709-1722.
92. Khalil A, Al-Haddad C, Hariri H, et al. A Novel Mutation in FOXC1 in a Lebanese Family with Congenital Heart Disease and Anterior Segment Dysgenesis: Potential Roles for NFATC1 and DPT in the

- Phenotypic Variations. *Front Cardiovasc Med.* 2017;4:58.
93. Medina-Trillo C, Aroca-Aguilar J-D, Ferre-Fernandez J-J, et al. Role of FOXC2 and PITX2 rare variants associated with mild functional alterations as modifier factors in congenital glaucoma. *PLoS One.* 2019;14(1):e0211029.
  94. Ferre-Fernandez J-J, Aroca-Aguilar J-D, Medina-Trillo C, et al. Whole-Exome Sequencing of Congenital Glaucoma Patients Reveals Hypermorphic Variants in GPATCH3, a New Gene Involved in Ocular and Craniofacial Development. *Sci Rep.* 2017;7:46175.
  95. Weinreb RN, Kashiwagi K, Kashiwagi F, Tsukahara S, Lindsey JD. Prostaglandins increase matrix metalloproteinase release from human ciliary smooth muscle cells. *Invest Ophthalmol Vis Sci.* 1997;38(13):2772-2780.
  96. De Groef L, Van Hove I, Dekeyster E, Stalmans I, Moons L. MMPs in the trabecular meshwork: promising targets for future glaucoma therapies? *Invest Ophthalmol Vis Sci.* 2013;54(12):7756-7763.
  97. Alexander C, Votruba M, Pesch UE, et al. OPA1, encoding a dynamin-related GTPase, is mutated in autosomal dominant optic atrophy linked to chromosome 3q28. *Nat Genet.* 2000;26(2):211-215.
  98. Kelberman D, Islam L, Lakowski J, et al. Mutation of SALL2 causes recessive ocular coloboma in humans and mice. *Hum Mol Genet.* 2014;23(10):2511-2526.
  99. Nishiguchi S, Wood H, Kondoh H, Lovell-Badge R, Episkopou V. Sox1 directly regulates the gamma-crystallin genes and is essential for lens development in mice. *Genes Dev.* 1998;12(6):776-781.
  100. Flugel-Koch C, Ohlmann A, Fuchshofer R, Welge-Lussen U, Tamm ER. Thrombospondin-1 in the trabecular meshwork: localization in normal and glaucomatous eyes, and induction by TGF-beta1 and dexamethasone in vitro. *Exp Eye Res.* 2004;79(5):649-663.
