# Supplementary material for: Exome Sequencing in a Swiss Childhood Glaucoma Cohort Reveals CYP1B1 and FOXC1 Variants as Most Frequent Causes
Source: PubMed Central journal article supplement — Transl Vis Sci Technol. 2020 Jun 30;9(7):47. doi: 10.1167/tvst.9.7.47 (PMC7414719; doi:10.1167/tvst.9.7.47), 2020-06-30
Supplement: tvst-9-7-47_s002.pdf [file tvst-9-7-47_s002.pdf]

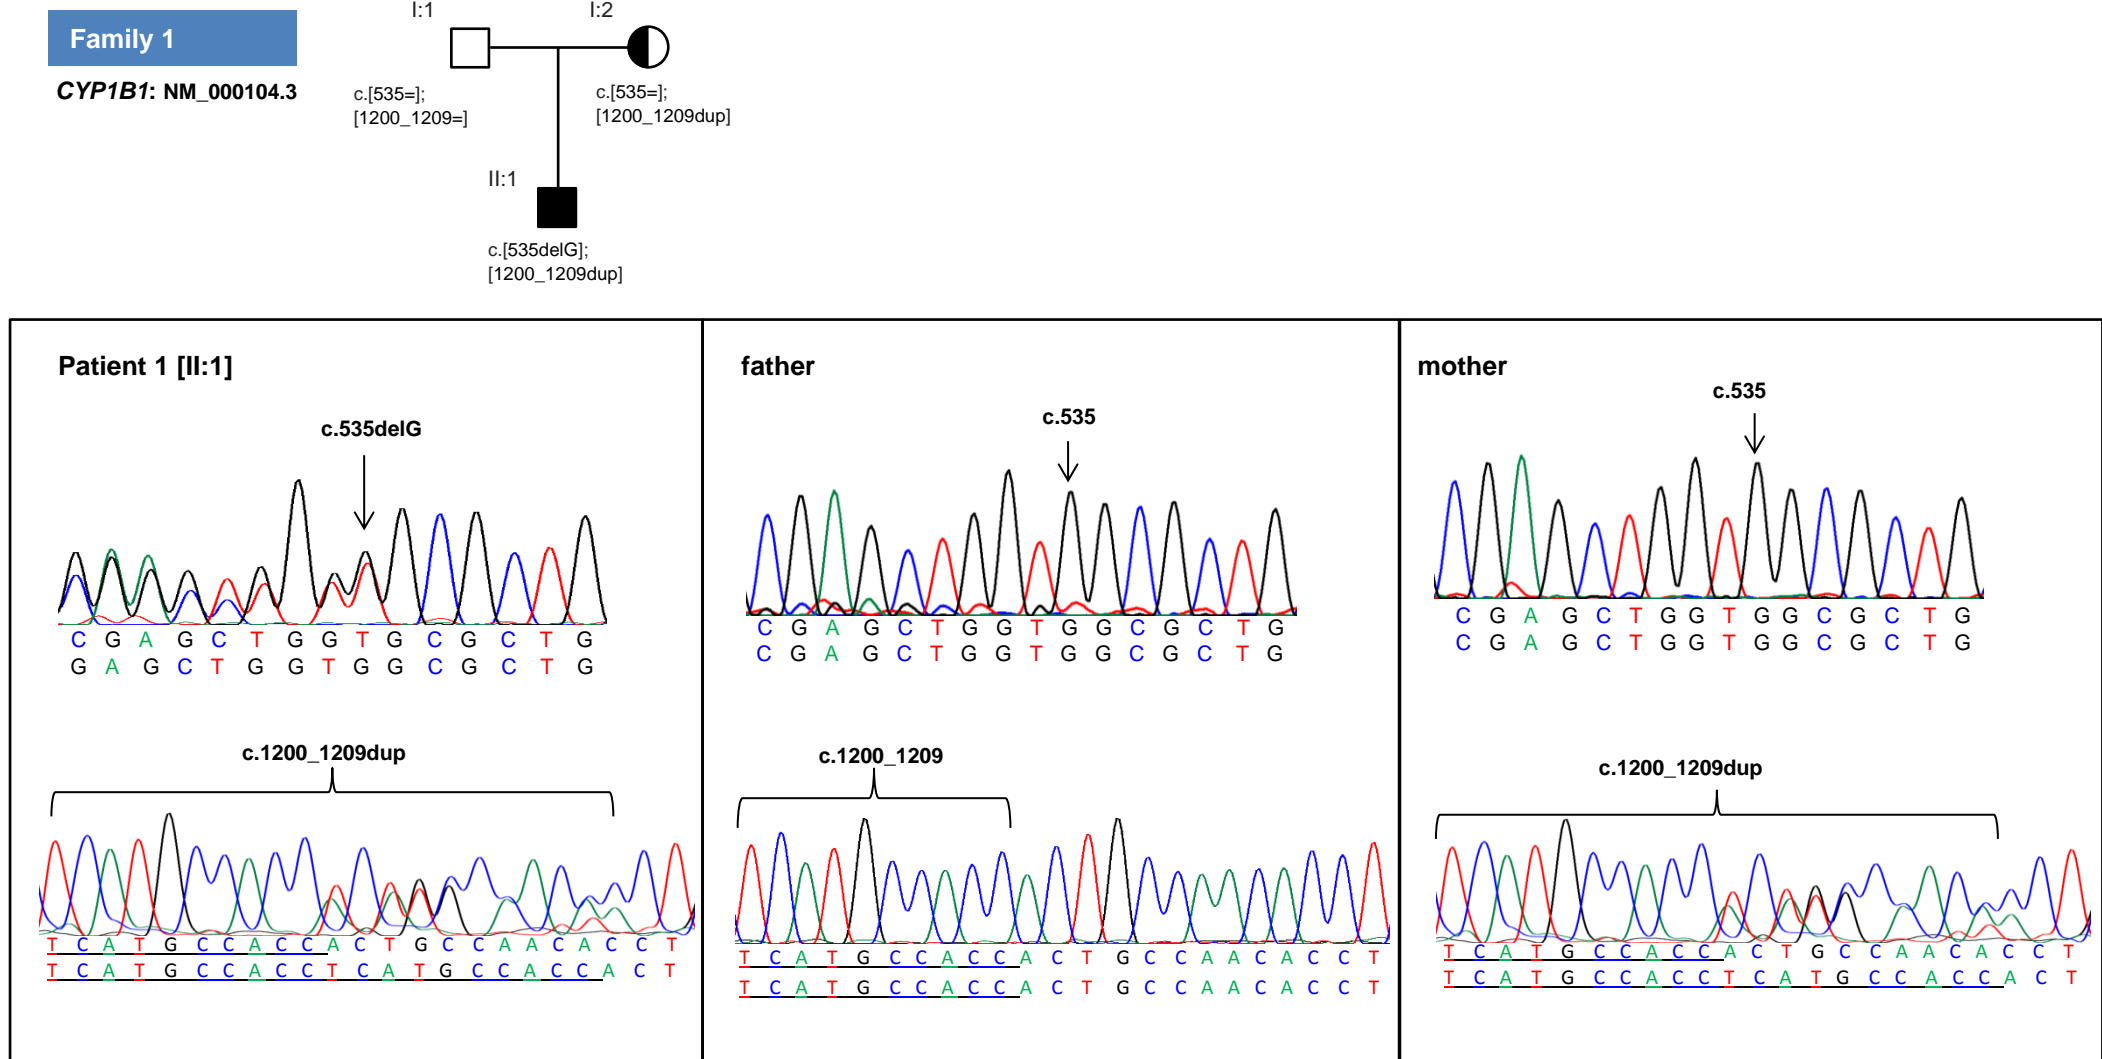

**Figure S1** Sanger sequencing electropherograms of family 1

Family 2

**CYP1B1: NM\_000104.3**

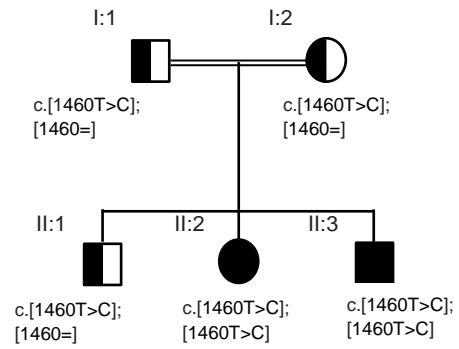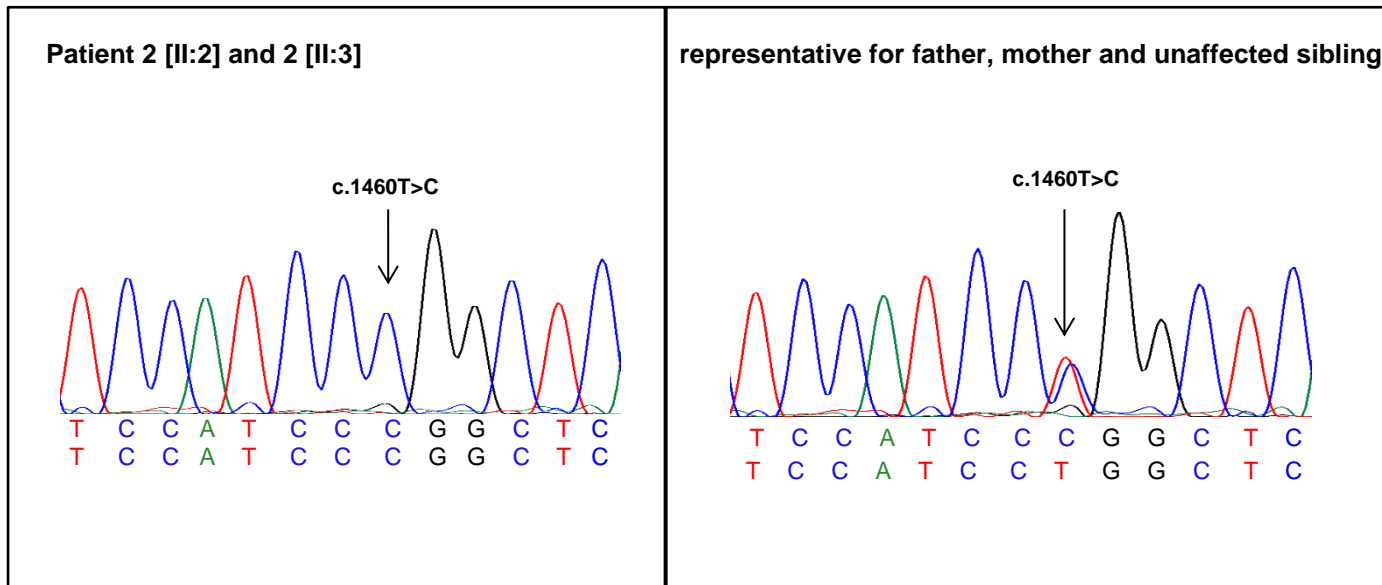

**Figure S2** Sanger sequencing electropherograms of family 2



Family 4

*CYP1B1*: NM\_000104.3

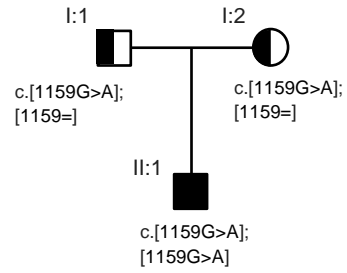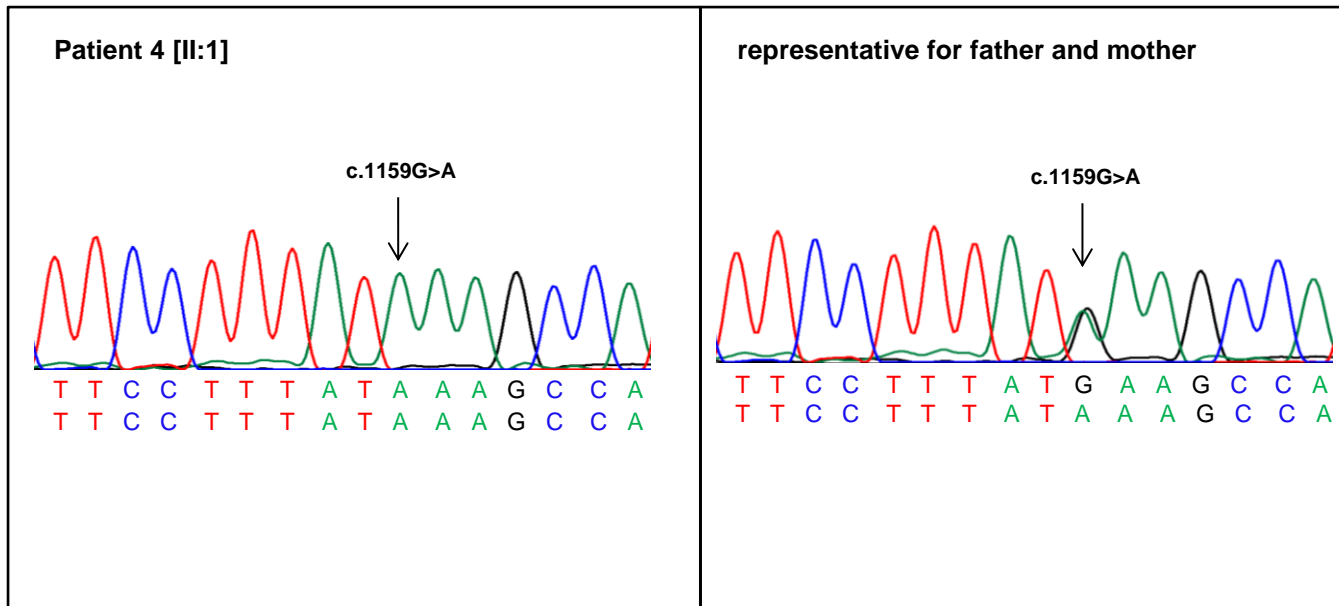

Figure S4 Sanger sequencing electropherograms of family 4

**Family 5**  
**FOXC1: NM\_001453.2**

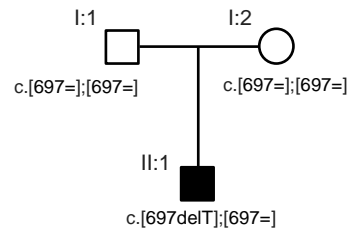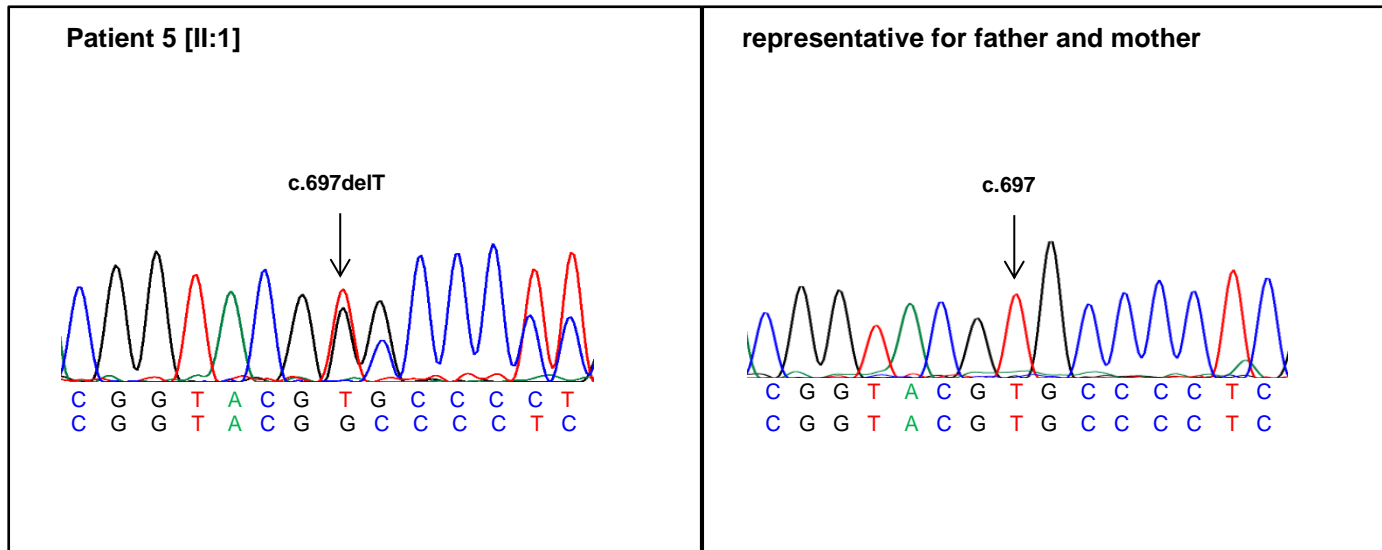

**Figure S5** Sanger sequencing electropherograms of family 5

Family 6

**FOXC1: NM\_001453.2**

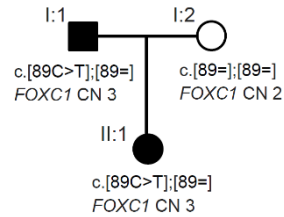

Representative for patient 6 [II:1] and 6 [I:1]

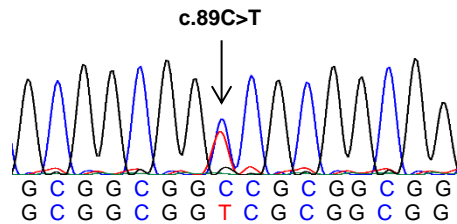

**FOXC1 copy number: 3 (MLPA)**

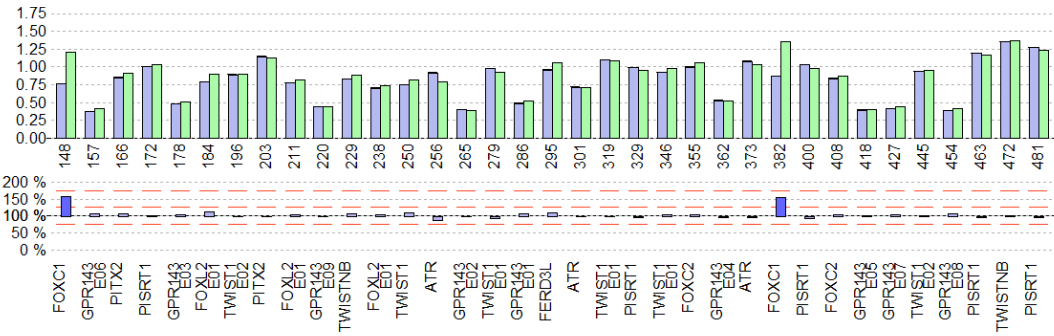

mother

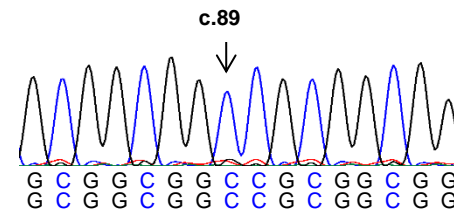

**FOXC1 copy number: 2 (MLPA)**

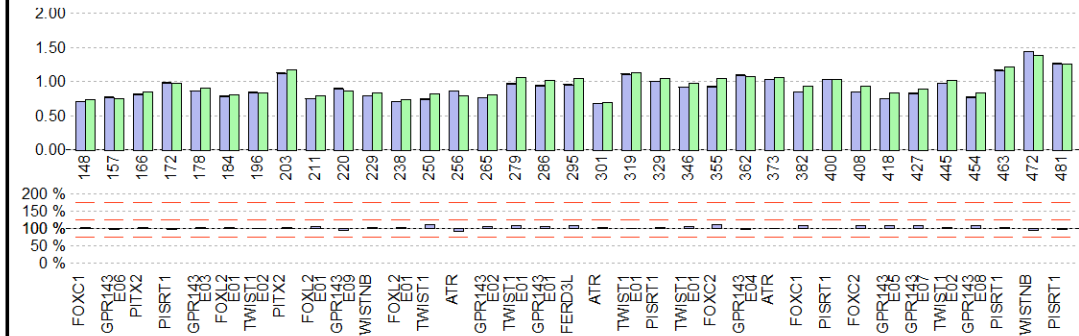

**Duplication includes FOXC1, FOXF2 and parts of GMDS (CytoCHIP Illumina)**

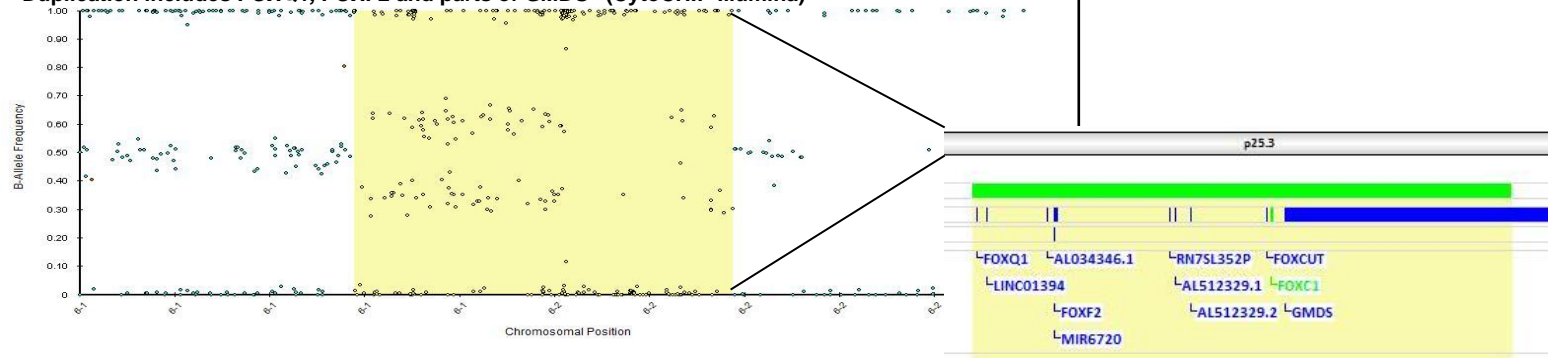

**Figure S6** Sanger sequencing electropherograms, multiplex ligation-dependent probe amplification (MLPA) results and microarray data of family 6

**Family 7**  
**FOXC1: NM\_001453.2**

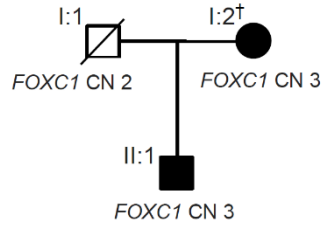

**Representative for patient 7 [II:1] and mother (patient 7 [I:2])**

**FOXC1 copy number: 3 (MLPA)**

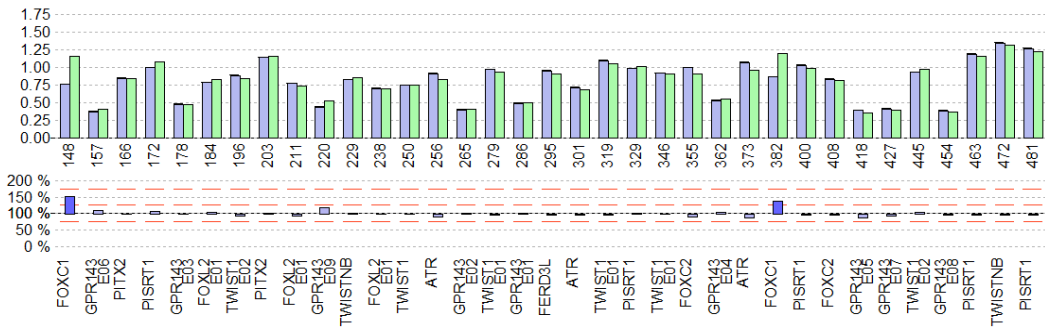

**father**

**FOXC1 copy number: 2 (MLPA)**

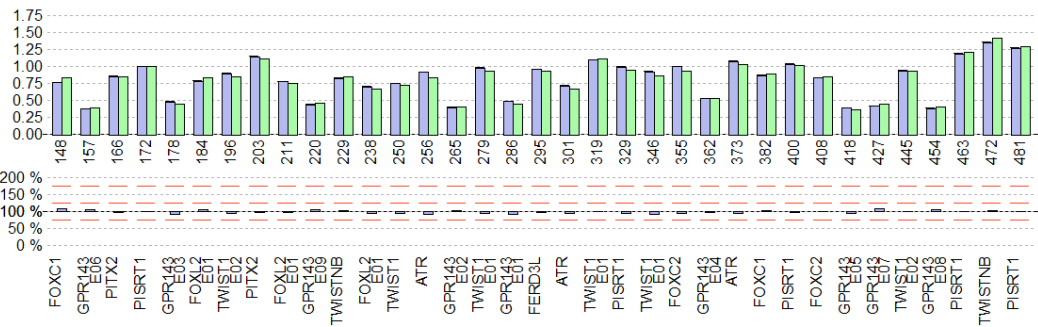

**Duplication includes FOXC1, FOXF2 and parts of GMDS (CytoCHIP Illumina)**

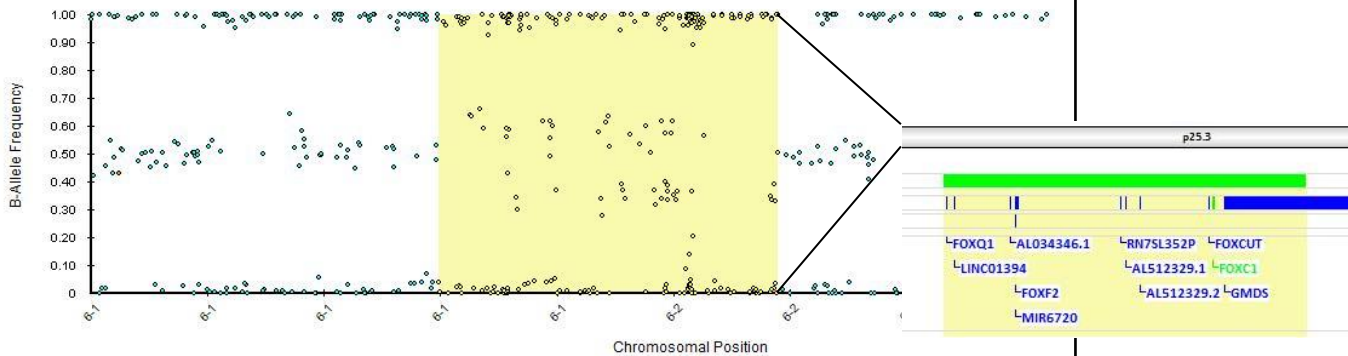

**Figure S7** Multiplex ligation-dependent probe amplification (MLPA) results and microarray data of family 7
