# Supplementary figures and images for: Exome Sequencing in a Swiss Childhood Glaucoma Cohort Reveals CYP1B1 and FOXC1 Variants as Most Frequent Causes
Source: PubMed Central journal article supplement — Transl Vis Sci Technol. 2020 Jun 30;9(7):47. doi: 10.1167/tvst.9.7.47 (PMC7414719; doi:10.1167/tvst.9.7.47), 2020-06-30

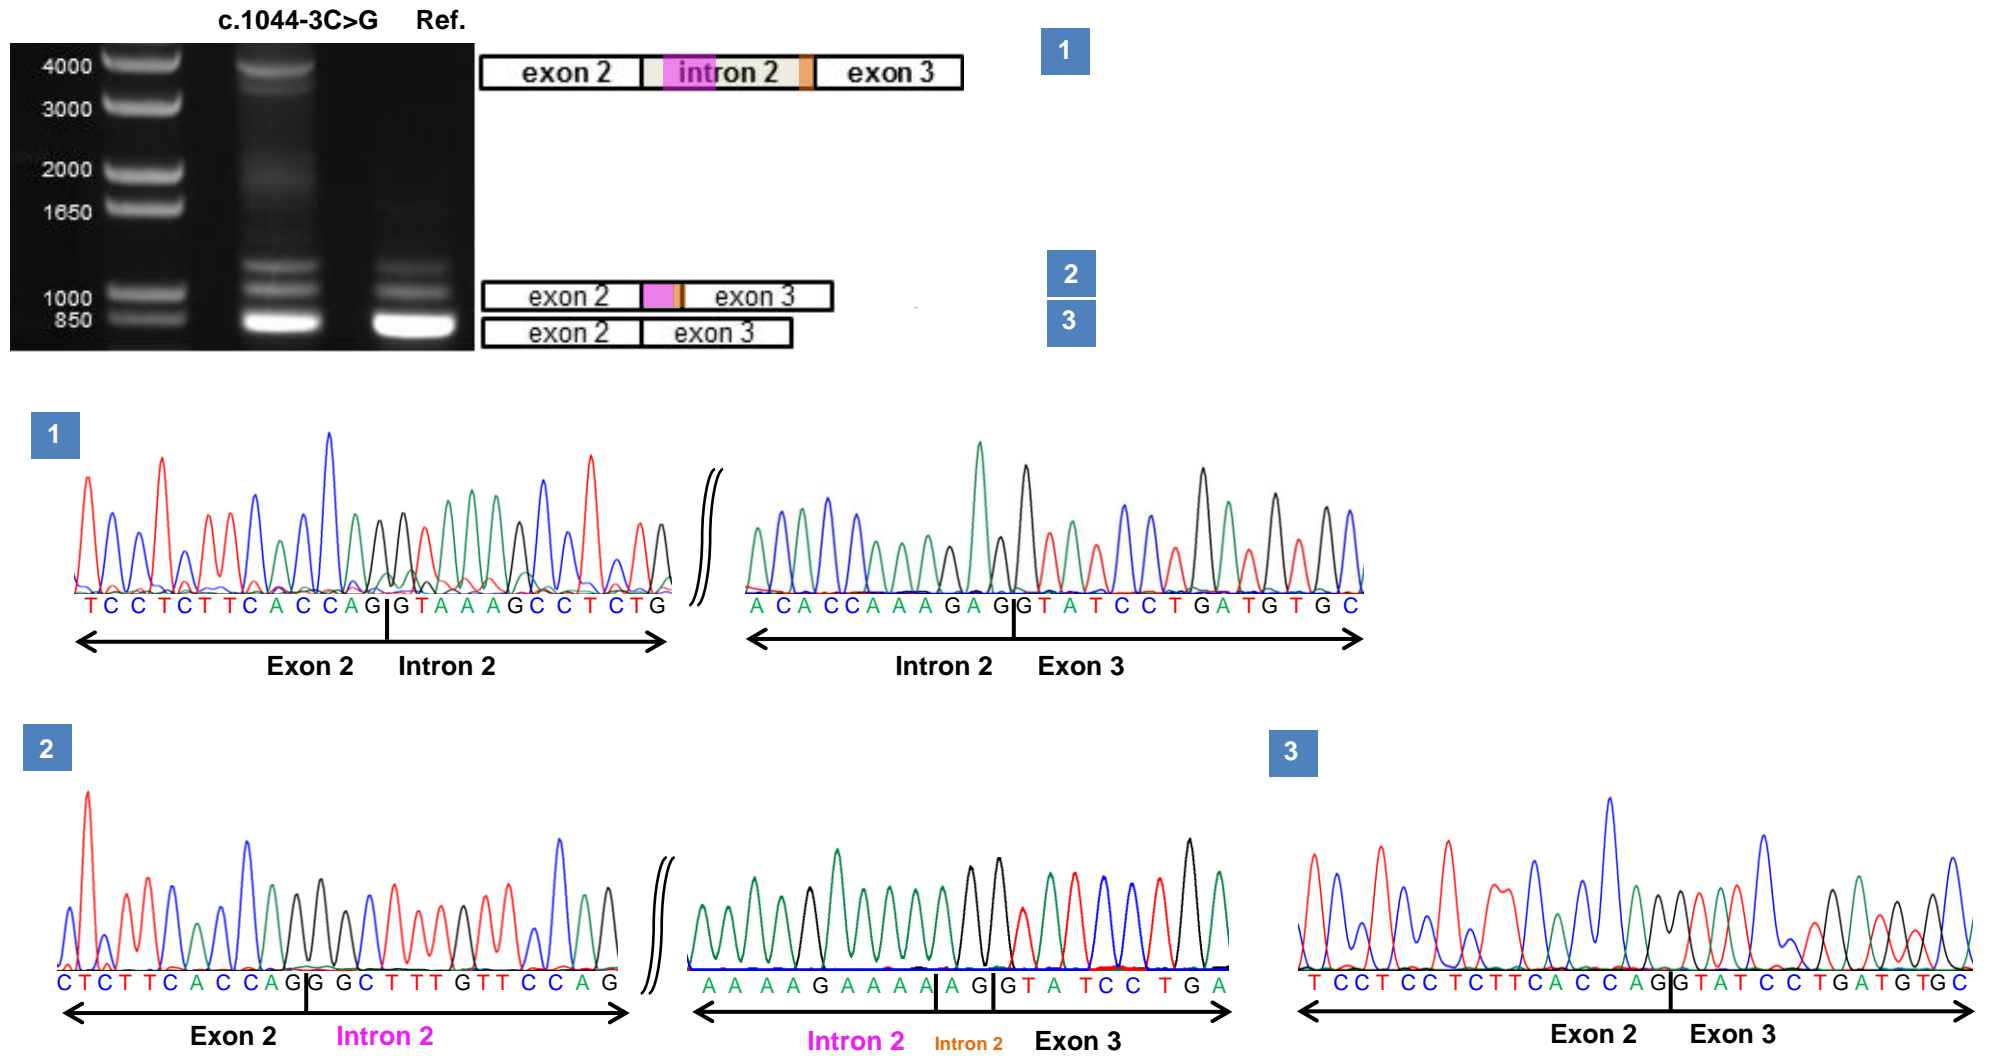

**Figure S8** Sanger sequencing chromatograms of the minigene assay PCR products

Supplement: tvst-9-7-47_s003.pdf [file tvst-9-7-47_s003.pdf]
